# Supplementary material for: Health risks assessment for trace elements accumulation in Amaranthaceae family cultivars and their correlation with macro-minerals
Source: Research Square preprint supplement (doi:10.21203/rs.3.rs-5808849/v1), 2025-01-31
Supplement: Supplementary file 1 [file daaf1256b4afd8410faf5daa.docx]

**Environmental Monitoring and Assessment**

**Health risks assessment for trace elements accumulation in Amaranthaceae family cultivars and their correlation with macro-minerals**

Pooja Sharma1, Sophayo Mahongnao1 and Sarita Nanda1*

*1Department of Biochemistry, Daulat Ram College for Women, University of Delhi, Delhi - 110007, India.*

*Correspondence:

*Department of Biochemistry, Daulat Ram College for Women, University of Delhi,*

*4, Patel Marg, Maurice Nagar, Delhi- 110007, India.*

Mob.- (+91) 9999680604

saritananda123@gmail.com

**(f)**

**(e)**


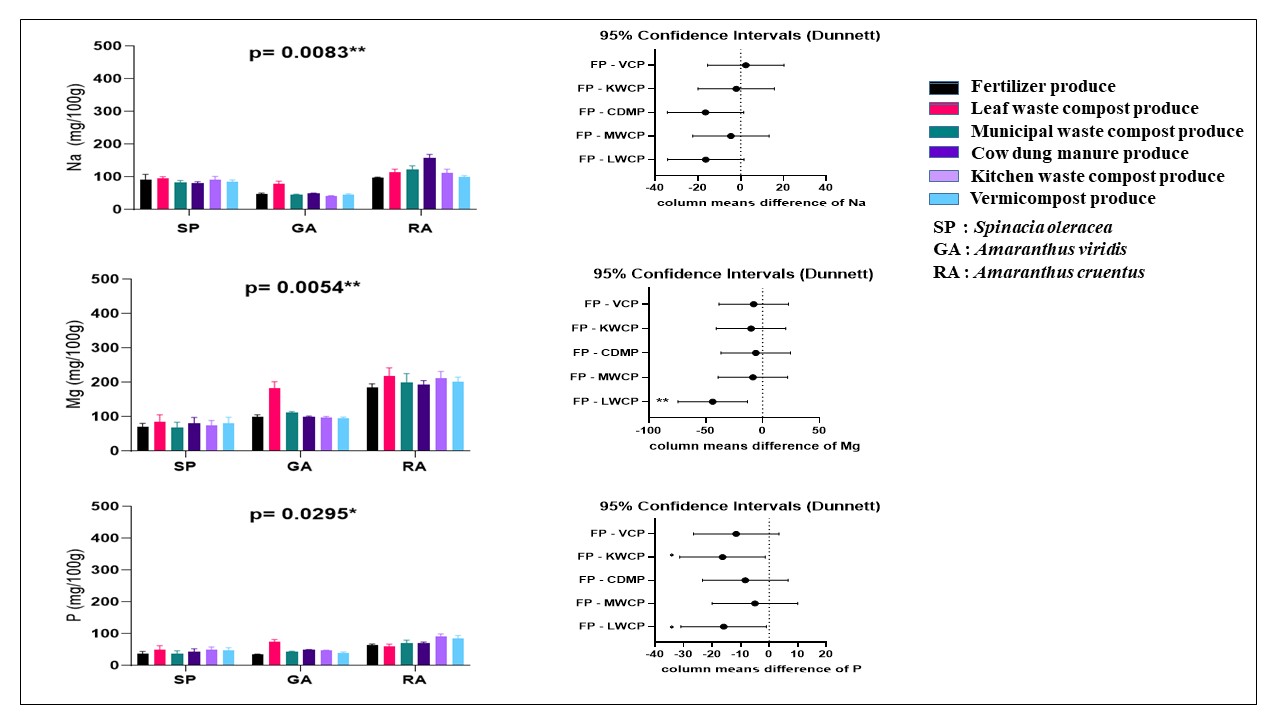


**(b)**

**(a)**

**(d)**

**(f)**

**(e)**

**(c)**

**Fig. S1** Macro-minerals (mean ± standard error) of garden cultivars (n=3)**:** These graphs show (a) Sodium (Na) content. (b) Dunette for Na (c) Magnesium (Mg) content. (d) Dunette for Mg (e) Phosphorus (P) content. (f) Dunette for P. Asterisk (*) indicates statistical significance


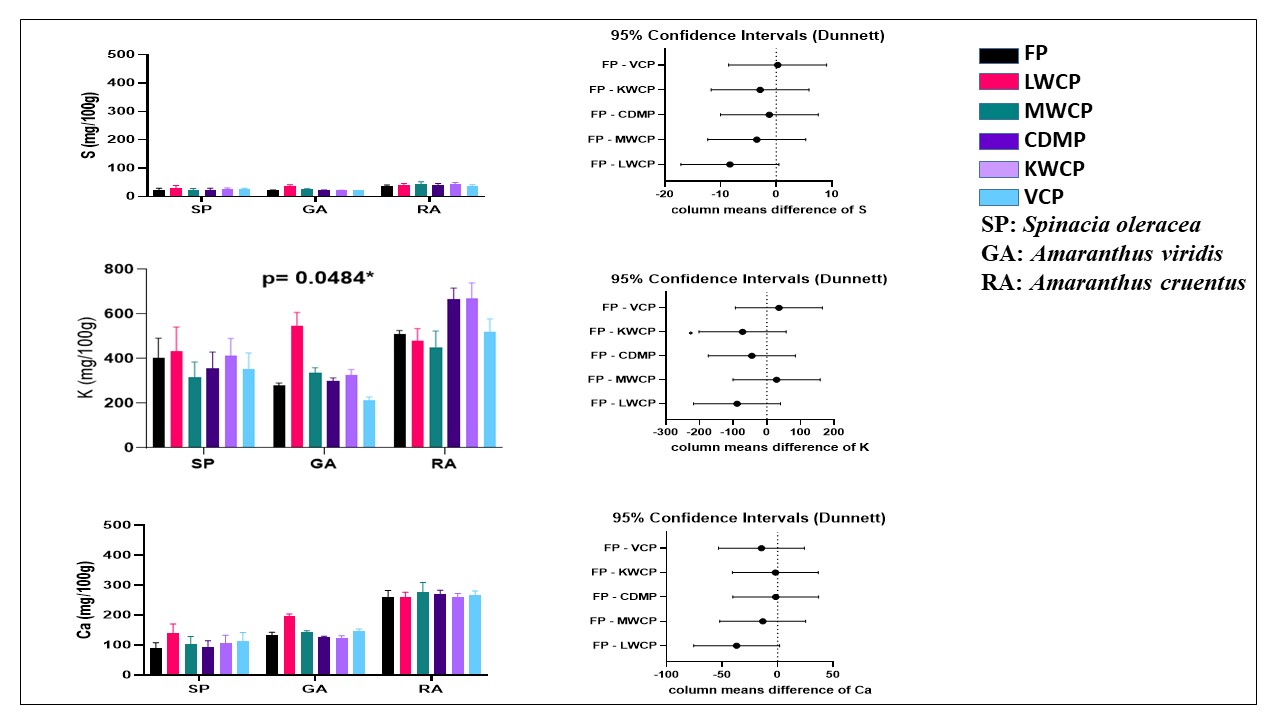


**(c)**

**(d)**

**(f)**

**(e)**

**(b)**

**(a)**

**Fig. S2** Macro-minerals (mean ± standard error) of garden cultivars (n=3): These graphs show (a) Sulphur (S) content. (b) Dunette for S. (c) Potassium (K) content. (d) Dunette for K. (e) Calcium (Ca) content. (f) Dunette forCa.Asterisk (*) indicates statistical significance

**(h)**

**(f)**

**(d)**

**(g)**

**(c)**

**(e)**


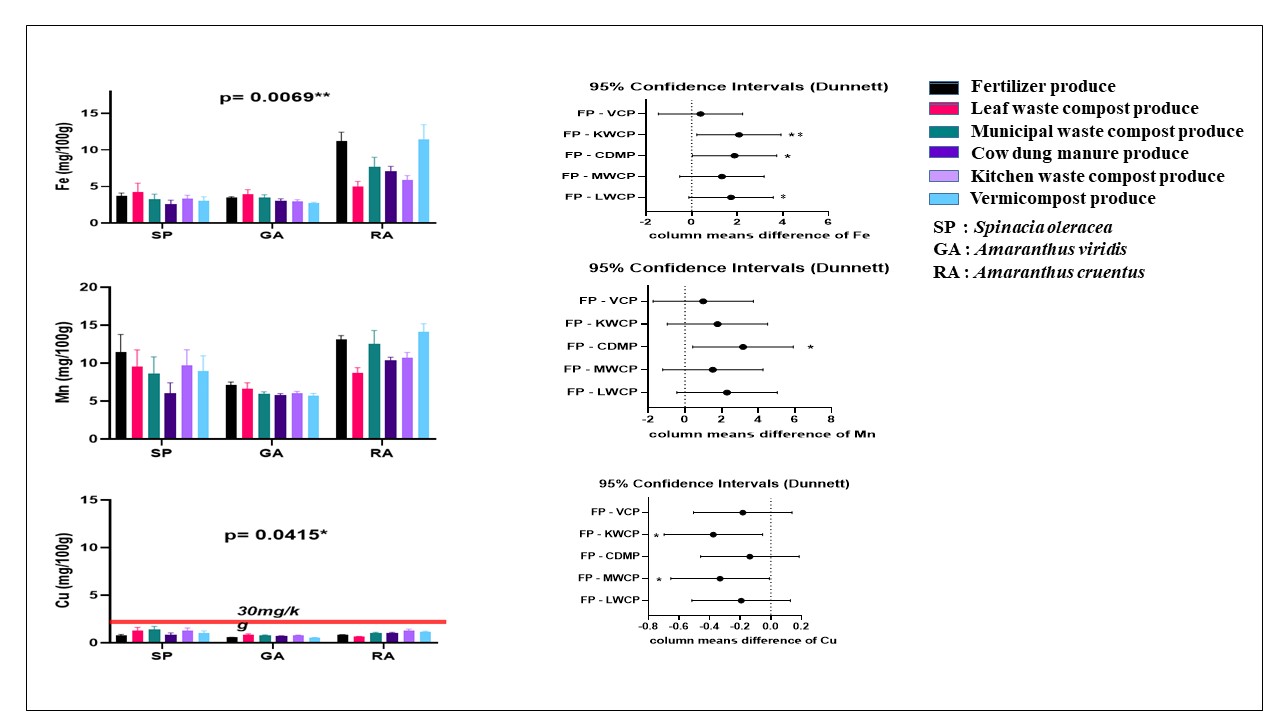
**Fig. S3** Trace elements (mean ± standard error) of garden cultivars (n=3): These graphs show (a) Iron (Fe) content. (b) Dunette for Fe (c) Manganese (Mn) content. (d) Dunette for Mn (e) Copper (Cu) content. (f) Dunette for Cu.Asterisk (*) indicates statistical significance

**(a)**

**(b)**

**(d)**

**(f)**

**(e)**

**(c)**

*
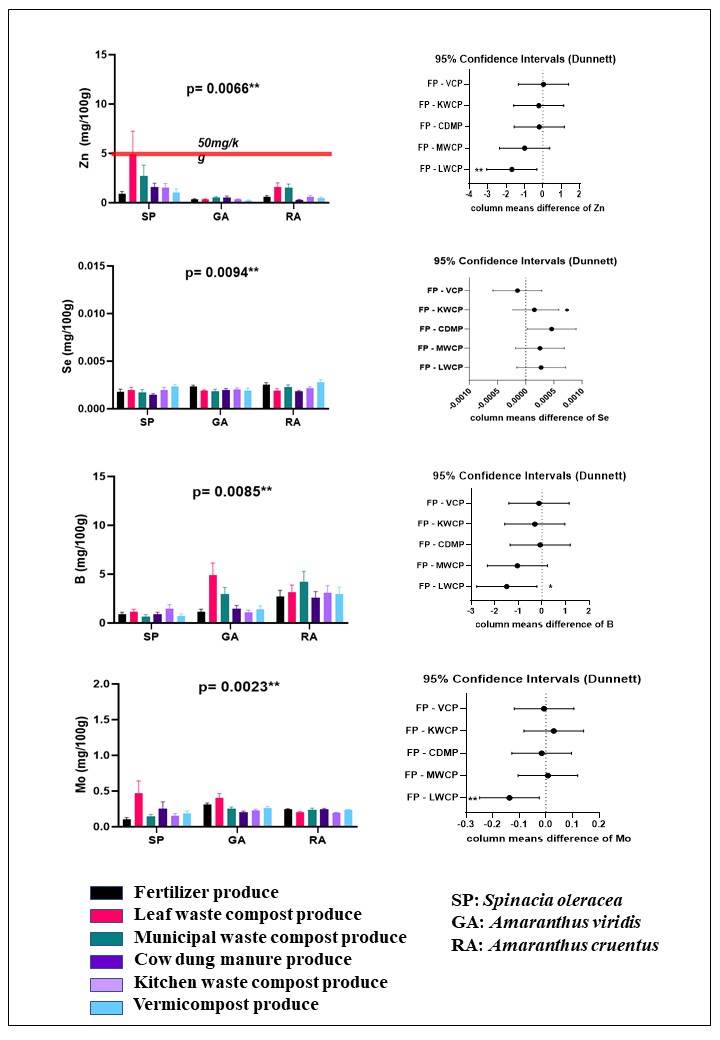
*

**(h)**

**(f)**

**(d)**

**(b)**

**(g)**

**(c)**

**(e)**

**(a)**

**Fig. S4** Trace elements (mean ± standard error) of garden cultivars (n=3): These graphs show (a) Zinc (Zn) content. (b) Dunette for Zn (c) Selenium (Se) content. (d) Dunette for Se (e) Boron (B) content. (f) Dunette for B (g) Molybdenum (Mo) content. (h) Dunette for Mo. Asterisk (*) indicates statistical significance
